# Supplementary material for: Extracellular enzyme activity in the coastal upwelling system off Peru: a mesocosm experiment
Source: Copernicus journal article supplement (doi:10.5194/bg-20-1605-2023), 2023-04-21
Supplement: Supplementary file 1 [file bg-20-1605-2023-supplement.pdf]

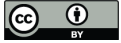

*Supplement of*

## **Extracellular enzyme activity in the coastal upwelling system off Peru: a mesocosm experiment**

**Kristian Spilling et al.**

*Correspondence to:* Kristian Spilling ([kristian.spilling@syke.fi](mailto:kristian.spilling@syke.fi))

The copyright of individual parts of the supplement might differ from the article licence.

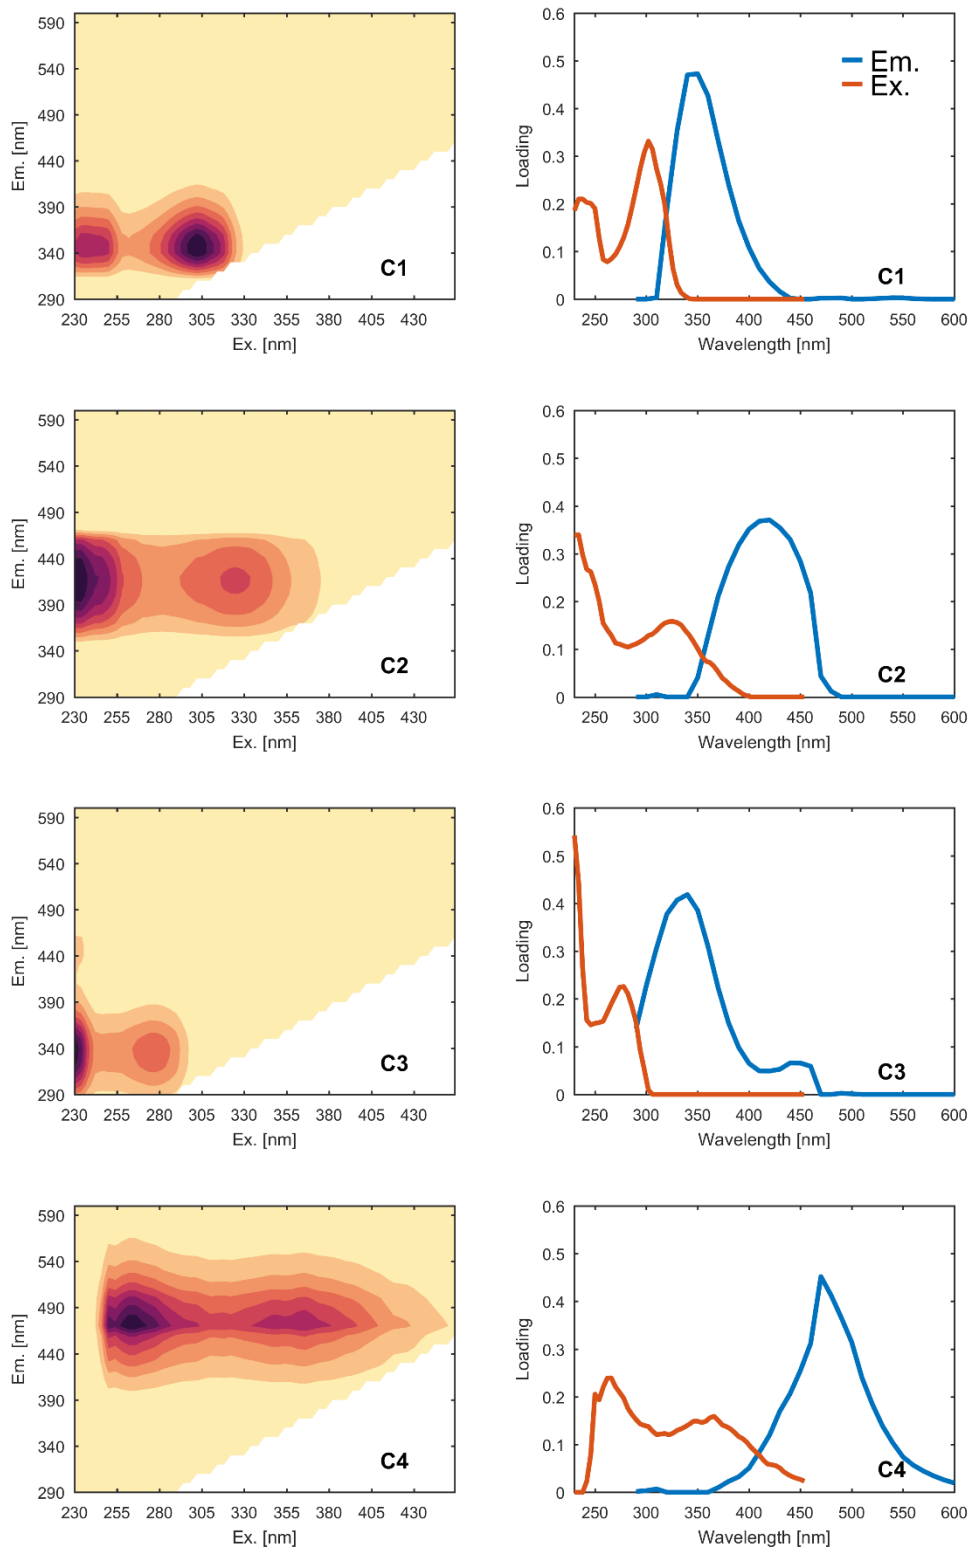

Supplementary Fig S1. FDOM components (C1-C4) derived from the PARAFAC analysis. Left column: EEMs of each component. Right column: corresponding excitation and emission loadings.
